# Supplementary material for: Hierarchical dandelion-like CoS 2 hollow microspheres: self-assembly and controllable microwave absorption performance
Source: Royal Society of Chemistry journal article supplement (doi:10.1039/d3ra04890j), 2023-01-01
Supplement: d3ra04890j1.pdf [file d3ra04890j1.pdf]

## ***Supporting Information***

### ***Hierarchical Dandelion-like CoS<sub>2</sub> Hollow Microspheres: Self-Assembly and Controllable Microwave Absorption Performance***

Dongwei Xu <sup>a\*</sup>, Feifan Zhang <sup>a</sup>, Huanhuan Guo <sup>a</sup>, Sitong Liu<sup>a</sup>, Xuhai Xiong <sup>b</sup>, Xiaoqin Guo <sup>a</sup>, Ping Chen <sup>c\*</sup>

<sup>a</sup> *School of Material Science and Engineering, Henan Key Laboratory of Aeronautical Materials and Application Technology, Zhengzhou University of Aeronautics, Zhengzhou, Henan 450046, China*

<sup>b</sup> *Liaoning Key Laboratory of Advanced Polymer Matrix Composites, Shenyang Aerospace University, Shenyang, 110136, China*

<sup>c</sup> *State Key Laboratory of Fine Chemicals, Dalian University of Technology, Dalian, 116024, China*

*\* Corresponding author:*

*Dr. Dongwei Xu, E-mail: xudongwei1029@126.com*

*Dr. Ping Chen, E-mail: chenping\_898@126.com*

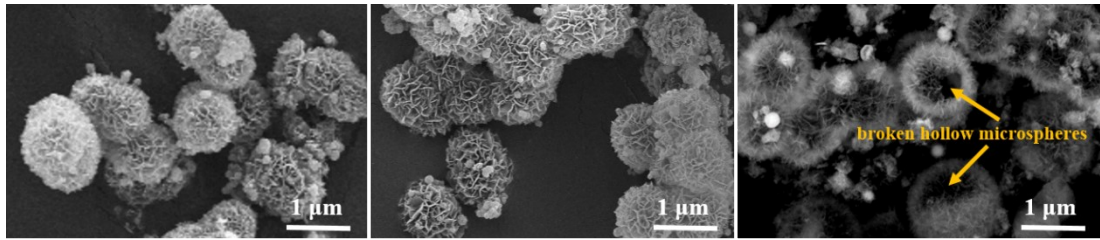

Fig.S1

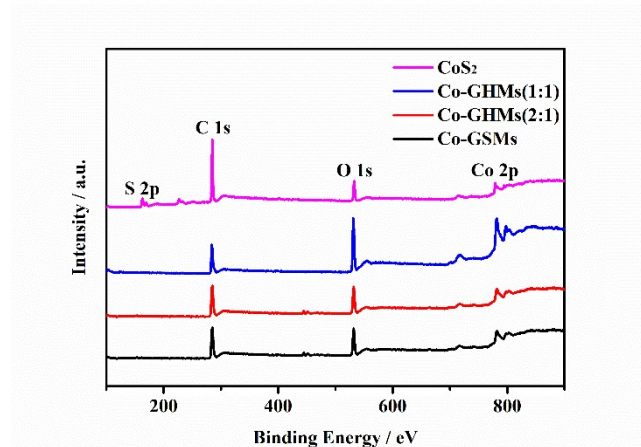

Fig.S2

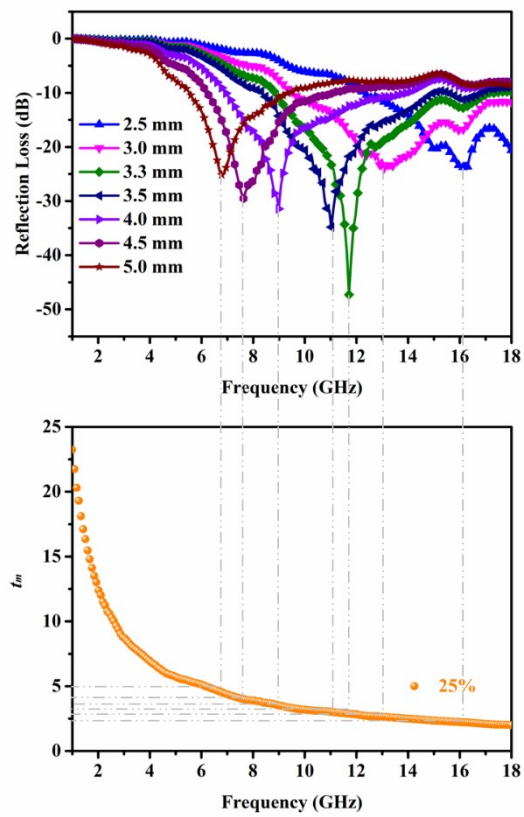

Fig.S3
